# Identifying Uncertainty States during Wayfinding in Indoor Environments: An EEG Classification Study

Bingzhao Zhu<sup>a,c</sup>, Jesus G. Cruz-Garza<sup>b</sup>, Mahsa Shoaran<sup>c</sup> and Saleh Kalantari<sup>\*b</sup>

<sup>a</sup>School of Applied and Engineering Physics, Cornell University, Ithaca, 14850, NY, USA

<sup>b</sup>Department of Design and Environmental Analysis, Cornell University, Ithaca, 14850, NY, USA

<sup>c</sup>Institute of Electrical Engineering and Center for Neuroprosthetics, EPFL, Geneva, 1202, Switzerland

---

## Abstract

The researchers used a machine-learning classification approach to better understand neurological features associated with periods of wayfinding uncertainty. The participants (n=30) were asked to complete wayfinding tasks of varying difficulty in a virtual reality (VR) hospital environment. Time segments when participants experienced navigational uncertainty were first identified using a combination of objective measurements (frequency of inputs into the VR controller) and behavioral annotations from two independent observers. Uncertainty time-segments during navigation were ranked on a scale from 1 (low) to 5 (high). The machine-learning model, a random forest classifier implemented using scikit-learn in Python, was used to evaluate common spatial patterns of EEG spectral power across the theta, alpha, and beta bands associated with the researcher-identified uncertainty states. The overall predictive power of the resulting model was 0.70 in terms of the area under the Receiver Operating Characteristics curve (ROC-AUC). These findings indicate that EEG data can potentially be used as a metric for identifying navigational uncertainty states, which may provide greater rigor and efficiency in studies of human responses to architectural design variables and wayfinding cues.

*Keywords:* Wayfinding, Uncertainty, Mobile brain/body imaging, Architectural design, Classification

---

## 1. Introduction

Spatial navigation is an essential human skill, critical for our survival. It allows individuals to use angular and linear motion as cues to monitor their position within a space [1, 2]. This skill is particularly important in environments that are complex or novel, such as hospital buildings. In these spaces, visitors and patients often cannot build on existing experiences or expectations, and must instead rely on our spatial navigation abilities to reach a destination.

The sequence of decisions that comprise human navigation are of ten undertaken under conditions of both uncertainty and urgency, and such decisions rarely match the rational ideal for optimized path-finding. Building users may lack the spatial/cognitive abilities to interpret all of the available information about the environment with complete accuracy, and they may encounter incongruent and conflicting information that does not match other sense perceptions. Given the complexity of such facilities and the limitations of human cognition, it is unlikely that it will ever be possible to completely eliminate experiences of uncertainty and the resulting inefficient behaviors in human navigation. Thus, it is important to understand how people experi-

ence wayfinding uncertainty and how they resolve those uncertainty states.

Our understanding of exactly what happens in the brain during times of wayfinding uncertainty is currently very limited. It is well established that navigational uncertainty is usually experienced as an undesirable state, associated with discomfort and negative emotions [3, 4]. In the broader context persistent conditions of uncertainty have been linked to the emergence of sub-optimal decision strategies, as well as diminished well-being and even psychopathology [5, 6, 7, 8, 9, 10, 11].

[12] found that the type of information source (GPS device vs. human informant) influenced the decisions that participants made in situations of navigational uncertainty. The needs that people have during such conditions may differ from ordinary navigation; for example, [13] suggested that a wayfinder in uncertain conditions will eventually enter a “defensive” wayfinding mode that involves proceeding cautiously and investing excessive mental effort in scanning for conflicting information. Currently the “defensive wayfinding” model remains conceptual and largely informal, and like the overall understanding of wayfinding uncertainty it needs to be grounded in more empirical research to un-

49 derstand the specific neurological responses that are in-  
50 volved.

### 51 *1.1. Behavioral uncertainty measurement in wayfind-* 52 *ing studies*

53 Clear uncertainty measurements are needed to rigor-  
54 ously analyze how uncertainty affects cognitive behav-  
55 ior [14]. Researchers have taken diverse approaches to  
56 this topic. For example, [15] used the behavioral pat-  
57 tern of “looking around” as an indicator of navigational  
58 uncertainty, and instrumentalized that behavior based  
59 on participant’s head motions. [16] used a more de-  
60 tailed “entropy value” to measure navigational uncer-  
61 tainty states, which the based on the purposefulness of  
62 physical motions and the extent to which participants  
63 were looking at near objects vs. far objects. [8] exten-  
64 sively theorized this concept of entropy, and their work  
65 has been adopted by various researchers to develop  
66 measures of uncertainty using behaviors such as walk-  
67 ing speed, specific eye movements, and other physiolog-  
68 ical and neurophysiological responses [17, 18, 19, 20].

69 The predominant outlook is that wayfinding entropy  
70 arises when there is conflict between various forms of  
71 perceptual information and various behavioral options  
72 [8]. As proposed by Hirsh and colleagues, affective re-  
73 sponses to uncertainty are linked to four primary mech-  
74 anisms. First, uncertainty is a challenge that decision-  
75 makers are constantly seeking to reduce. Second, con-  
76 flicts between expected outcomes and environmental  
77 cues contribute to uncertainty states. Third, expertise in  
78 a domain of endeavor can assist in resolving uncertainty.  
79 Finally, the experience of uncertainty leads to anxiety,  
80 which has measurable physiological components. This  
81 outlook provides a framework within which behaviors  
82 and measurements associated with uncertainty can be  
83 clearly defined.

84 Researchers have shown that uncertainty increases  
85 cognitive load, and that it often engages working mem-  
86 ory resources, increasing vigilance and information-  
87 gathering [17, 21, 22, 23]. It also appears to pro-  
88 mote “metacognitive” processing, in which ambiguity  
89 is overtly recognized and neural responses are activated  
90 to enhance information processing (i.e., to avoid nega-  
91 tive consequences) [24]. Spatial navigation is likely a  
92 good domain in which to explore the cognitive impact  
93 of uncertainty more generally, given how frequently un-  
94 certainty arises during wayfinding and the importance  
95 of these processes to human survival (e.g., [15, 25]).

### 96 *1.2. Neural dynamics of uncertainty states during* 97 *wayfinding*

98 Over the last several decades, scholars have exam-  
99 ined the neural mechanisms associated with human spa-  
100 tial navigation [26, 27, 28, 29], though there has not  
101 been much particular emphasis on experiences of un-  
102 certainty in this research literature. Many of the re-  
103 lated studies break down their findings in terms of the  
104 wayfinding strategies that are employed by participants.  
105 For example, [26] compared the use of allocentric refer-  
106 ence frames (focused on external relationships or maps)  
107 against egocentric reference frames (focused on rela-  
108 tionships between the environment and self) during nav-  
109 igational tasks and found that switching between these  
110 reference frames is mediated by the brain’s retrosple-  
111 nial complex (RSC) [26, 1]. The RSC has been iden-  
112 tified as a relevant brain region in many other studies  
113 of wayfinding, including studies on the passive viewing  
114 of navigation footage, navigations that occur mentally,  
115 and navigations in both familiar and new environments  
116 [30, 31, 32, 33, 34, 35]. The RSC is directly connected  
117 to the hippocampus as well as the occipital and parietal  
118 cortices, with indirect links to the middle prefrontal cor-  
119 tex [36]. These connections make it a strong candidate  
120 for being regarded as the central region for cognitive  
121 functions related to spatial orientation [37] during phys-  
122 ical head rotations.

123 Functional magnetic resonance imaging (fMRI) stud-  
124 ies have also found engagement of the parietal cortex  
125 during human wayfinding [38, 39]. In fMRI studies the  
126 activation of both the parahippocampal place area (PPA)  
127 and the RSC been seen during navigation and even dur-  
128 ing the passive observation of stimuli related to naviga-  
129 tion [40, 41, 42, 43, 34, 35]. Many researchers believe  
130 that during spatial navigation, the PPA encodes the cur-  
131 rent environment for future recall and recognizability,  
132 while the RSC aids in orientation within the space and  
133 movements towards currently unseen navigational tar-  
134 gets [32]. In this way, [32] asserts, the RSC and PPA  
135 have corresponding but separate roles in navigational  
136 tasks.

137 Another study observing the involvement of the pari-  
138 etal, occipital, and motor cortices in spatial navigation  
139 tasks found an association between theta-band modu-  
140 lation in the frontal cortex and dominant perturbations  
141 of the alpha band during navigation when participants  
142 used an egocentric reference frame. In contrast, allo-  
143 centric navigation in the same study was associated with  
144 synchronization of the 12–14 Hz band and desynchro-  
145 nization of the 8–13 Hz band in the RSC [1]. This prior  
146 research points toward the brain regions that seem to be

147 crucial for wayfinding and some of the EEG band dy-  
148 namics that may occur during navigational tasks. How-  
149 ever, there has been almost no research linking specific  
150 patterns that may occur in these brain regions to differ-  
151 ent wayfinding activities/sub-states such as periods of  
152 certainty vs. uncertainty.

### 153 1.3. Purpose of the current study

154 The present study was conducted to improve our un-  
155 derstanding of neural features that may distinguish be-  
156 tween wayfinding certainty vs. uncertainty states. We  
157 first annotated the wayfinding states (from video clips of  
158 participants in a VR hospital environment) using obser-  
159 vational/behavioral data, and then we used a machine-  
160 learning approach to determine if those annotated states  
161 could be predicted from the participants' EEG data. While  
162 there have been some similar recent efforts [44] in  
163 using an EEG classification approach to detect "atten-  
164 tion states" during wayfinding, we are not aware of any  
165 other studies that have used continuous neural measures  
166 to identify wayfinding uncertainty.

167 We used a VR approach in this study to improve  
168 the ease of data-collection and to help reduce poten-  
169 tial confounding variables that might impact the EEG  
170 signals and/or the ability to conduct trials (i.e., motion  
171 artifacts or potential conflicts with other individuals in  
172 the hallways) [45]. Virtual reality is a commonly used  
173 tool in wayfinding studies [46, 47, 48, 49, 50, 51, 52].  
174 While the use of VR must be considered a limitation in  
175 terms of generalizing to real-world environments, prior  
176 research has shown that there is a strong overlap in neu-  
177 ral responses between VR wayfinding and real-world  
178 wayfinding [53]. The use of VR also allows for a pre-  
179 cise control of environmental design factors and precise  
180 tracking of participant behaviors [54, 55, 56], and is  
181 supported in wayfinding research [57].

182 The VR environment that we developed was based  
183 on actual hospital design documents. The reason for  
184 using a hospital environment in the study is that these  
185 facilities are large, complex, and unfamiliar for many  
186 visitors [58, 59]. The population that has to navigate  
187 through these complicated buildings typically includes  
188 a large number of first-time and infrequent visitors, as  
189 well as individuals who may be in a state that impairs  
190 their judgment, perception, or mobility (from sickness,  
191 anxiety, injury, etc.). Difficulties in wayfinding due to  
192 inadequate design features have been shown to be a sig-  
193 nificant source of stress for hospital patients as well as  
194 a significant burden on hospital employees and an ob-  
195 stacle to operational efficiency [60, 58, 61, 62]. While  
196 responses to specific architectural design features were  
197 not compared in the current study, future work using our

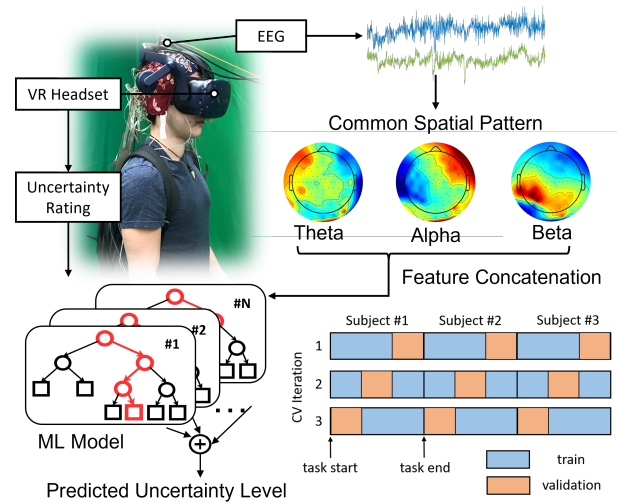

Figure 1: Schematic overview of decoding uncertainty during the wayfinding tasks. The certainty and uncertainty periods were first annotated by the researchers based on a rigorous screening process, described in detail in section 2.4 and Appendix B. We then extracted the common spatial pattern features from three EEG frequency bands (theta, alpha, and beta) for the annotated time epochs, and used a Random Forest classifier to identify EEG features associated with the certainty vs. uncertainty states. To evaluate classification performance, we split the EEG recordings of each subject into k-folds without shuffling. For each cross-validation (CV) iteration, we used one fold from each subject as the validation set and the other folds as the training set. This data-splitting approach is less sensitive to cross-subject differences since the training set consists of multi-subject recordings.

198 approach may contribute to improved interior designs  
199 and more comfortable wayfinding experiences.

## 200 2. Materials and Methods

### 201 2.1. Participants

202 Thirty-four healthy adult participants were recruited.  
203 Data from 4 of the participants was excluded from the  
204 study due to the presence of extensive line-noise arti-  
205 facts and event-logging problems. We analyzed the  
206 EEG data from the remaining 30 participants (9 report-  
207 ing as female and 21 as male;  $M_{age} = 26.5$ ,  $SD = 6.2$ ,  
208 Range 20–41). After receiving verbal and written expla-  
209 nations of the study requirements, all participants pro-  
210 vided written informed consent. The study procedures  
211 were approved by the Institutional Review Board for  
212 Human Participant Research (IRB) at Cornell Univer-  
213 sity.

### 214 2.2. Procedure

215 The hospital environment and wayfinding tasks in  
216 this study were designed and implemented using Epic

217 Games' Unreal Engine. We used the Blueprints Vi- 268  
218 sual Scripting system to construct the architectural en- 269  
219 vironment, which was then rendered to the participants 270  
220 through an HTC Vive Pro head-mounted display. A 271  
221 non-invasive EEG cap was used to record electrical 272  
222 brain activity at 512 Hz for 128 channels, through the 273  
223 ActiView System (BioSemi Inc., Amsterdam, Nether- 274  
224 lands) with Ag/AgCl active electrodes. The VR envi- 275  
225 ronments, EEG data, and experiment event marker data  
226 were timestamped, streamed, recorded, and synchron-  
227 ized using the Lab Streaming Layer [63].

228 Sessions were conducted for one participant at a time. 277  
229 During each session, after providing consent the partic- 278  
230 ipant was carefully fitted with the physiological sensors 279  
231 by trained research team members. To establish resting- 280  
232 state data, the participant was asked to sit quietly fac- 281  
233 ing a blank computer monitor for one minute, and then 282  
234 to sit quietly with eyes closed for one minute. Once 283  
235 the resting-state data were collected, the participant was 284  
236 fitted with the VR headset and entered the virtual en- 285  
237 vironment. An initial five-minute "free" period in the 286  
238 VR allowed the participant to become familiar with the 287  
239 navigational tools and to explore the platform. 288

240 During the following experiment, the same ten navi- 289  
241 gational tasks were assigned to each participant. These 290  
242 involved standard hospital visitor wayfinding experi- 291  
243 ences, such as locating a specific patient room (see 292  
244 Appendix A for a full description of the navigational 293  
245 tasks). To promote greater immersion, each task-series 294  
246 began with the presentation of a written scenario, ask- 295  
247 ing the participant to imagine themselves in a moder- 296  
248 ately stressful medical situation. The total time for 297  
249 the whole experiment for each participant was around 298  
250 120–150 minutes, including the EEG set-up, learning 299  
251 the VR controls, completing wayfinding tasks, and short 300  
252 breaks between the tasks. 301

### 253 2.3. EEG data pre-processing

254 The EEG data were pre-processed following [52]. 302  
255 The EEGLAB software package [64] was used for anal- 303  
256 ysis. Raw data were imported at 512 Hz and down- 304  
257 sampled to 128 Hz. The data were then filtered be- 305  
258 tween 0.1 and 50 Hz and run through the PREP Pipeline 306  
259 [65], which removes 60 Hz line noise and applies a ro- 307  
260 bust re-referencing method to minimize the bias intro- 308  
261 duced by referencing using noisy channels. Bad chan- 309  
262 nels were removed if they presented a flatline for at least 310  
263 5 seconds and if the correlation with other channels was 311  
264 less than 0.70 [66, 67]. Time windows that exceeded 312  
265 15 standard deviations were adjusted using artifact sub- 313  
266 space reconstruction [68], based on spherical spline in- 314  
267 terpolation from neighboring channels. The data were 315  
316

then re-referenced to the average of all 128 channels. Rank-adjusted Independent Component Analysis (ICA) was also used to identify artifactual components via the ICLabel toolbox [69], in order to automatically remove "Muscle" and "Eye" associated components with a threshold of 0.70. The ICs were further inspected visually by the researchers to remove artifact-laden components.

### 276 2.4. Identifying wayfinding uncertainty epochs

277 To identify periods of uncertainty during the wayfind- 278  
279 ing tasks, we first segmented the VR scenes into 5- 279  
280 second video clips. The video clips were parsed based 280  
281 on the frequency of joystick button presses, which can 281  
282 serve as a measure of frequent routing changes and/or 282  
283 reviews of the environment. The clips were then also 283  
284 independently labelled by two human annotators, fol- 284  
285 lowing the protocol detailed in Appendix B. This anno- 285  
286 tation involved rating the uncertainty level in each clip 286  
287 on a scale from 1 (lowest) to 5 (highest), using behav- 287  
288 ior cues such as head movements ("looking around") 288  
289 and changes/reversals in direction. Overall, we obtained 289  
290 1270 annotated video epochs representing participant 290  
291 wayfinding periods. After the annotation, we performed 291  
292 a two-step cleaning process to select the most represen- 292  
293 tative video clips and remove ambiguous classifications. 293  
294 For the first step, we removed the video clips in which 294  
295 participants were not engaged in wayfinding activities, 295  
296 for example if they were standing in an elevator or were 296  
297 encountering technical issues (these clips were given a 297  
298 wayfinding uncertainty rating of "0" by the annotators 298  
299 to mark them for exclusion). A total of 324 video clips 299  
300 were excluded at this phase. In the second step, we re- 300  
301 moved video clips which failed to reflect the extreme 301  
302 certainty (uncertainty score = 1) or uncertainty (uncer- 302  
303 tainty score  $\geq 4$ ) states. An additional 564 clips were 303  
304 removed during this process, which left us with a final 304  
305 evaluation set of 382 video epochs that were deemed to 305  
306 have reliable uncertainty ratings. 306

### 306 2.5. Machine learning model

307 Figure 1 shows the schematic overview of how uncer- 307  
308 tainty was analyzed in relation to the EEG data. After 308  
309 the video clips were given a behavioral uncertainty rat- 309  
310 ing by the annotators, we filtered the associated EEG 310  
311 recordings for those time periods to extract the theta 311  
312 (4–8 Hz), alpha (8–12 Hz) and beta (12–30 Hz) bands, 312  
313 across the entire brain. After bandpass filtering, the 313  
314 EEG signals were decomposed using the Common Spa- 314  
315 tial Patterns (CSP) algorithm [70]. CSP is a super- 315  
316 vised decomposition approach, which requires "ground

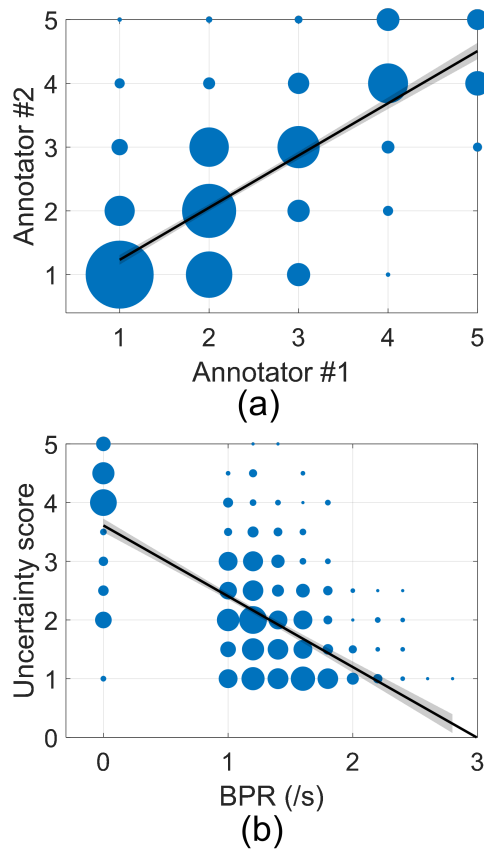

Figure 2: (a) Consistency between two annotators. There is a good consistency between the ratings from two annotators (Pearson’s P value: 0.77). (b) Correlation between human-annotated uncertainty scores and BPR. We observed a negative correlation between BPR and human-annotated uncertainty score (Pearson’s P value: -0.64). We show the least-squares fitted linear line with the shaded area indicating 95% confidence bound. Marker size represents the number of epochs.

317 truth” as input. The CSP algorithm finds spatial filters that maximize the differences in variance between  
318 two classes. This algorithm identifies the informative EEG patterns that are correlated to the wayfinding  
319 uncertainty states and we chose it for use in our analysis because CSP can effectively separate signal from noise.  
320 These input conditions were based on the researcher’s classification of uncertainty states during the wayfinding  
321 tasks. The CSP transformation steps were implemented using the MEG+EEG Analysis and Visualization (MNE)  
322 tools implemented in Python [71]. After CSP transformation, we selected the top 20 CSPs from each frequency  
323 band based on the absolute deviation of their eigenvalues from 0.5. We used the average power of the CSP  
324 patterns to represent the neural activity and applied a log transform to standardize the band features.  
325  
326  
327  
328  
329  
330  
331  
332

333 The features from the three bands were concatenated to construct a feature vector, which was fed into a machine  
334 learning model for classification purposes. Our goal is to predict the uncertainty state for each EEG epoch by  
335 only looking at the corresponding feature vector. We then trained a random Forest Classifier algorithm with  
336 100 trees to predict the human-annotated uncertainty level. The classification model was implemented using  
337 scikit-learn in Python. Given the imbalanced class distribution, we measured the model’s performance in  
338 terms of the area under the Receiver Operating Characteristics curve (ROC).  
339  
340  
341  
342  
343  
344

345 To develop the machine-learning model, we separated the training and validation sets using a cross-validation  
346 scheme as detailed in Figure 1. The EEG signals of each participant were uniformly split into five k-folds,  
347 following the chronological order of the time series. In each cross-validation iteration, we used 4 of the  
348 folds from each participant to train the model, and 1 fold from each participant for validation. As a result,  
349 both the training and validation sets included recordings from the entire group of participants, which greatly  
350 reduces the impact of cross-subject differences. The validation set consisted of a continuous, unshuffled EEG  
351 block from each subject to maintain the chronological order and minimize information leakage caused by  
352 shuffling data [72, 73, 74].  
353  
354  
355  
356  
357  
358  
359

360 To further identify important features in the classification of uncertainty vs. certainty states, we measured  
361 the total impurity reduction contributed by each CSP. The impurity reduction is the criterion to grow decision  
362 trees and it can be efficiently calculated to quantify the importance of features in a Random Forest classifier  
363 (ensemble of decision tree). Starting from using the single attribute that achieved the highest feature  
364 importance score, we sequentially added new attributes to the subset based on their importance. With this  
365 selection approach, we were able to remove redundant CSPs and find the optimal subset to detect the human  
366 uncertainty state during the wayfinding tasks.  
367  
368  
369  
370  
371  
372

### 373 3. Results

#### 374 3.1. Observational annotations of wayfinding uncertainty

375  
376 As shown in Figure 2(a), there was a high consistency between two annotators, with a Pearson’s  
377 correlation coefficient of 0.77. Figure 2(b) shows the relation between human-annotated uncertainty scores  
378 and BPR. We observed that high uncertainty scores are associated with low BPR, where participants struggled  
379 to find the  
380  
381

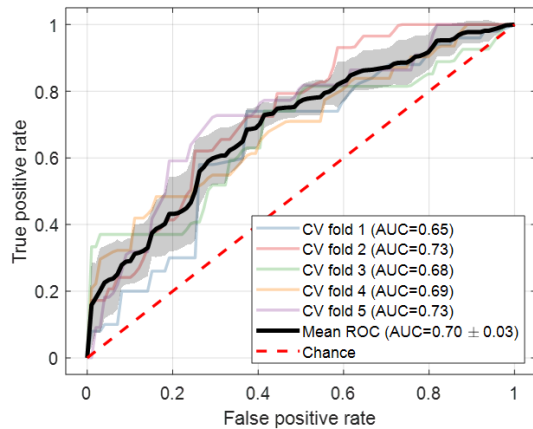

Figure 3: Receiver operating characteristic (ROC) curves for predicting human-annotated uncertainty scores. We show the ROC curves over 5-fold cross-validation (CV) and achieved an average area-under-the-curve score of 0.70 for uncertainty decoding. The shaded area indicates the standard deviation.

382 right direction and make movements. On the other hand, 383 high BPR is associated with decisive movement which 384 indicates low uncertainty score.

### 385 3.2. Classification performance

386 Figure 3 shows the ROC for each cross-validation 387 fold, where the mean ROC and standard deviation are 388 indicated for the all trials. We achieved an average area- 389 under-the-curve score of 0.70. The classification perfor- 390 mance is higher than the chance level (0.5), which indi- 391 cates the successful distinction between certainty and 392 uncertainty states during the hospital wayfinding task. 393 Since we extracted all the features from EEG, our re- 394 sults shows that the participants' uncertainty states can 395 be decoded from noninvasive brain recordings.

### 396 3.3. Feature visualization through CSPs

397 To better understand the informative indicators for 398 uncertainty decoding, we interpret the model predic- 399 tion using Shapley Additive Explanations (SHAP, [75]). 400 Figure 4(a) presents 4 consecutive screen shots of 401 a video clip, where the participant swung head and 402 showed little intention to make a movement. This video 403 clip received an average uncertainty score of 4.5 from 404 the raters (i.e., very high uncertainty). With SHAP, we 405 visualize the dominating factors which contribute to the 406 model prediction. In Figure 4(b), red CSPs push the 407 model to reach a high uncertainty prediction, whereas

408 blue CSPs contributes more to a low uncertainty predic- 409 tion. Overall, the red CSPs have a higher impact (in- 410 dicated by the length of red/blue bars), which leads to 411 a correct prediction of the current epoch as a mo- 412 ment of uncertainty. Figure 5 is similar to Figure 4 413 but presents an epoch of decisive movement, which re- 414 ceived the lowest uncertainty score (1) from both anno- 415 tators.

416 In Figure 4(b), an increase in alpha power in parietal- 417 left (Fig.4(b) i) regions and frontal-right (Fig.4(b) ii) re- 418 gions is associated with high uncertainty scores during 419 wayfinding. A CSP pattern with lower theta band-power 420 in right-frontal region (Fig.4(b) iii) contributes to the 421 classification model prediction for the high-uncertainty 422 class (red line). The opposite patterns were observed 423 for the low-certainty class (blue line): there was alpha 424 power suppression in left-parietal regions (Fig.4(b) iv), 425 and high theta power in occipital and right-frontal re- 426 gions (Fig.4(b) v).

427 In the example of Figure 4b, the EEG patterns as- 428 sociated with this epoch were classified as a “high un- 429 certainty” because of the largest weights (red-blue line) 430 in those patterns with increased alpha power in left- 431 parietal and right-frontal regions (Fig.4(b) i and ii), 432 with concurrent decreased theta power in frontal regions 433 (Fig.4(b) iii).

434 Figure 5(b) shows an example of a low uncertainty 435 navigation epoch, as classified by the EEG CSP band- 436 power features random forest model. This sample 437 shows a pronounced theta power decrease in frontal and 438 pre-frontal regions (Fig.5(b) ii), predictive of low navi- 439 gation uncertainty (blue line). The most significant CSP 440 component in alpha power for low-uncertainty (blue 441 line) in this example shows low weighting in frontal re- 442 gions, and high weighting for occipital areas (Fig.5(b) 443 iii), which stands in contrast to the largest contributing 444 alpha power CSP in Figure 4(b) (ii).

445 Higher theta power in parietal areas has been ob- 446 served in salient landmark-based wayfinding scenarios 447 in virtual reality [50]. Increased theta power in the 448 retrosplinal cortex has also been found when partici- 449 pants rotate their head searching for navigational cues in 450 VR environments, compared to translational movement 451 [37]. Studies in VR maze learning have also found that 452 there are more prevalent theta episodes when a maze 453 becomes more difficult; suggesting that increased theta 454 activity is indicative of general demands of the task, 455 but not necessarily associated with immediate cognitive 456 demands [76]. In addition. Theta power increase has 457 been positively correlated to increased task difficulty in 458 frontal regions [1, 77, 78].

459 Alpha power suppression has been observed when

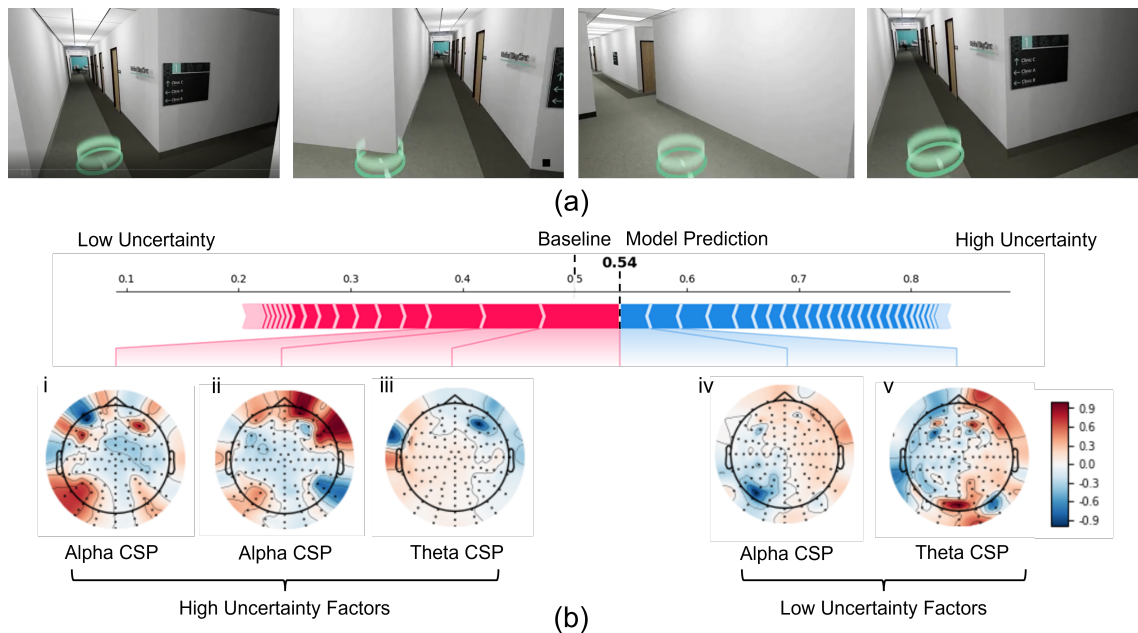

Figure 4: (a) Screenshots from a video clip in which the participant swung around with little intention for movement. The epoch received a 4.5 (very high) average uncertainty score from the raters. (b) Model prediction and interpretation of EEG data using Shapley Additive Explanations. The Random Forest model successfully classified the epoch as “uncertainty” by predicting an uncertainty score (0.54) higher than the baseline (0.5). The model prediction is driven by various CSP patterns from different bands. The factors contributing to high uncertainty prediction are shown in red, whereas those contributing to low uncertainty are in blue (red factors push the model prediction to the right, indicating higher uncertainty, while blue factors push the model prediction to the left). The CSP brain plots indicate that theta and alpha bands contributed most significantly to the classification of this epoch.

460 participants maintained orientation in active transla- 484  
 461 tional navigation tasks [37]. During tunnel turns in 485  
 462 VR, alpha suppression was found in visual cortex areas 486  
 463 for egocentric-reference frame participants; while 487  
 464 this suppression was stronger for egocentric reference- 488  
 465 frame participants, also found in inferior parietal and 489  
 466 retrosplinal areas [26]. Desynchronization in parietal- 490  
 467 region alpha band appears most prominent before stimu- 491  
 468 lus turns [79], while alpha power increases in right 492  
 469 parietal areas during maintained spatial navigation [80]. 493  
 470 Alpha suppression is associated with increased visual 494  
 471 processing and attentional processing [81] during mo- 495  
 472 bile active navigation. 496

### 473 3.4. Interpretation of classification

474 Our results indicate that a small subset of CSP fea- 499  
 475 tures can achieve a reasonably high performance in 500  
 476 identifying wayfinding uncertainty states. Figure 6(a) 501  
 477 shows the feature selection process, where we included 502  
 478 the most relevant CSPs from each EEG band. The clas- 503  
 479 sification performance was plotted as a function of the 504  
 480 CSP count in the subset, with the pie plots showing 505  
 481 which frequency band the CSPs were extracted from. 506  
 482 Using only 7 CSPs, we achieved a mean ROC-AUC 507  
 483 score of 0.69 for predicting the wayfinding uncertainty 508

level in each video clip, which is only 0.01 lower than 484  
 was achieved by using the entire set of CSP features. 485  
 Even more interestingly, these top 7 features only consist 486  
 of CSPs from the theta and alpha bands, indicating 487  
 that the beta band may have a limited role in the charac- 488  
 terization of human wayfinding uncertainty states. 489

490 We further visualized the exact CSP patterns that are 491  
 492 important for the wayfinding classification task. Dif- 493  
 494 ferent from the SHAP analysis which provides expla- 494  
 495 nation for each epoch, Figure 6(b) visualizes feature 495  
 496 importance from the group level. Specifically, we are 496  
 497 interested in the CSP patterns that lead to high clas- 497  
 498 sification performance. Figure 6(b) shows the CSP 498  
 499 patterns that separate the human-annotated uncertainty 499  
 500 score extremes (i.e., uncertainty score of  $\geq 4$  vs. uncer- 500  
 501 tainty score of 1) for the 5-s video clips. We observe 501  
 502 again that the theta band and the frontal channels have 502  
 503 most distinct variance between the certainty vs. uncer- 503  
 504 tainty classes. In the alpha band the frontal and parieto- 504  
 505 occipital locations had the most significant variation, as 505  
 506 observed with extremes in CSP weighting in these re- 506  
 507 gions. In the theta band, patterns in frontal and parietal 507  
 508 locations were also observed. These group-level weight 508  
 distributions for the most discriminant CSP patterns be- 508  
 tween 5-s epochs of time where a participant navigated

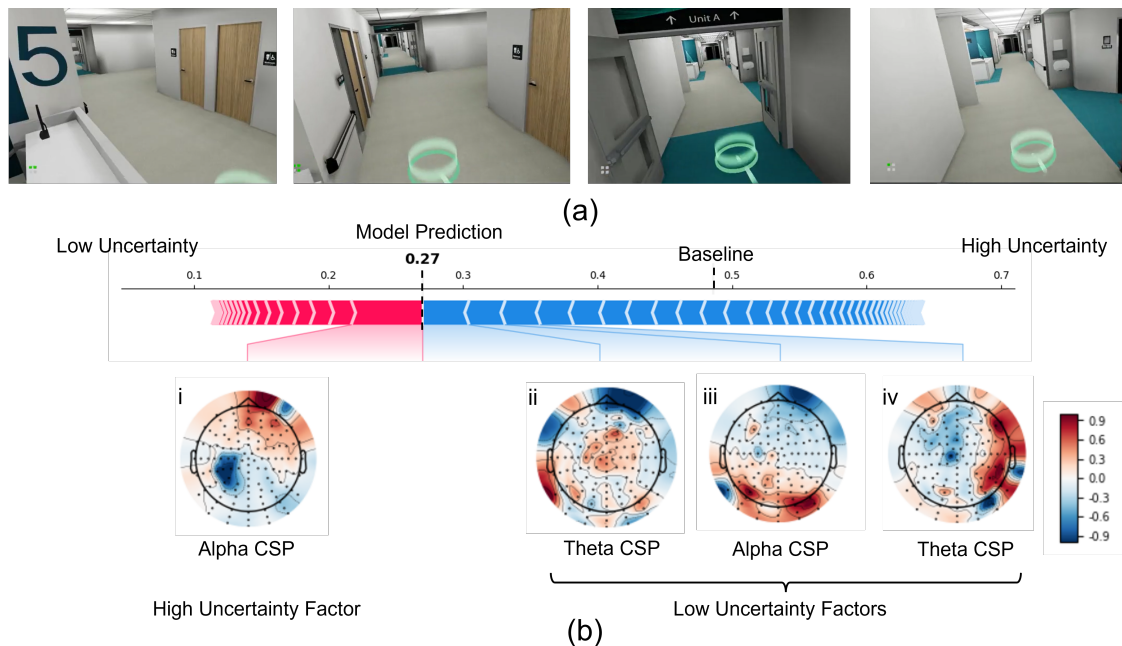

Figure 5: (a) Screenshot of a video clip in which the participant performed decisive movement. The uncertainty score from the raters for this clip was 1 (indicating very low levels of wayfinding uncertainty). (b) Model prediction and interpretation of the EEG data using Shapley Additive Explanations. The Random Forest model successfully classified this epoch as “certainty” by predicting an uncertainty level (0.27) lower than the baseline (0.5). The model prediction is driven by various CSP patterns from different bands. The factors contributing to high uncertainty prediction are shown in red, whereas those contributing to low uncertainty are in blue (red factors push the model prediction to the right, indicating higher uncertainty, while blue factors push the model prediction to the left). The CSP brain plots indicate that theta and alpha bands contributed most significantly to the classification of this epoch.

509 through the hospital setting capture the aggregate differ- 531  
 510 ences between uncertain and certain navigation. While 532  
 511 Figures 4 and 5 inspect a representative epoch sample 533  
 512 of the associated classification. 534

#### 513 4. Discussion 535

514 The main goal of this study was to assess if brain ac- 536  
 515 tivity could be used to characterize uncertainty events 537  
 516 during navigation in a complex building environment. 538  
 517 The results demonstrate that behavioral uncertainty in 539  
 518 human wayfinding likely has neurophysiological corre- 540  
 519 lates, which can potentially allow for the automatic clas- 541  
 520 sification of such uncertainty events during wayfinding 542  
 521 tasks. 543

522 The neurophysiological interpretation of CSP pat- 544  
 523 terns is only indicative of the most distinct patterns that 545  
 524 differentiate between the annotated classes in the exper- 546  
 525 iment: certain and uncertain-labeled 5-s epochs of nav- 547  
 526 igation through a VR hospital setting. It is not a source 548  
 527 localization method. The CSP algorithm finds spatial 549  
 528 filters that maximize variance for one class while min- 550  
 529 imizing the variance for the other class [82]. A strong 551  
 530 predictive contribution from a location in the scalp can 552

533 be due to consistent potentials associated with wayfind- 534  
 535 ing uncertainty, or alternatively, from consistent poten- 536  
 537 tials during high-certainty navigation epochs. The pat- 538  
 539 terns may also arise as a combination of both effects. 540  
 541 CSP pattern selection at the group level (Figure 6(b)) is 542  
 543 sensitive to outliers, as the selection is driven by eigen- 544  
 545 values (variance in one condition divided by the sum of 546  
 547 variances in both conditions). The scalp map pattern vi- 548  
 549 sualization is constrained by these limitations. We cal- 550  
 551 culated the average power of the filtered signal within 552  
 553 each trial [82], and visualized the CSP patterns in Fig- 554  
 555 ures 4 and 5. These examples provide a snapshot of the 556  
 557 random forest classifier’s decision which CSP patterns 558  
 559 were most significant, and the discerning patterns asso- 560  
 561 ciated with high uncertainty or low uncertainty. 561

562 In the SHAP analyses (Figures 4 and 5) there is a 563  
 564 clear network of frontal channels in the theta band, and 564  
 565 frontal with parieto-occipital contributions in the alpha 565  
 566 and theta bands, that are the primary drivers of the bi- 566  
 567 nary classification performance. The theta band contri- 567  
 568 butions in the frontal cortex mirrors previous findings of 568  
 569 theta and alpha band involvement in active navigation. 569  
 570 Frontal midline theta-band has been associated with ac- 570  
 571 tive navigation in VR contexts [83], with desynchro- 571



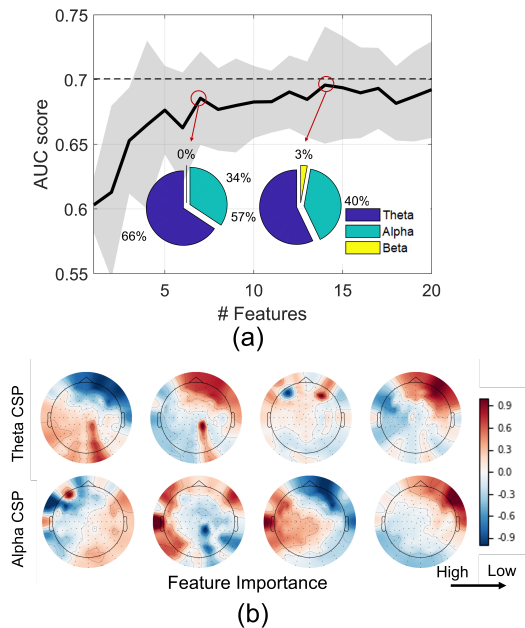

Figure 6: (a) Feature selection for predicting human-annotated uncertainty scores. The plot shows the classification performance as a function of the number of selected features. The baseline performance (dashed line) is achieved by using all 20 CSP features. Starting from only using one feature, we incrementally added features into the subset based on their importance. We were able to achieve the uncertainty classification with only a small subset of CSP features, with marginal performance loss. The distribution of feature types is shown by the pie plots, indicating that the most informative CSP features come from the theta and alpha bands. (b) Visualization of the most discriminative CSP patterns.

555 nization when an obstruction appeared. Higher theta  
 556 power in parietal areas has been previously observed in  
 557 landmark-based wayfinding scenarios [50] when partic-  
 558 ipants evaluated the landmarks in an active navigation  
 559 context. Further, in active navigational tasks, naviga-  
 560 tion based on egocentric reference frames recruited a  
 561 network of parietal, motor, and occipital cortices in the  
 562 alpha band, with frontal theta band modulation [1]; and  
 563 retrosplinal cortex involvement in heading computa-  
 564 tion [37], but not in translational movement. Studies in  
 565 VR maze learning have found that there is more preva-  
 566 lent theta activity when a maze becomes more difficult;  
 567 suggesting that increased theta activity is indicative of  
 568 general demands of the wayfinding task [76].

569 The current research provided the first steps in  
 570 developing a continuous EEG-based measurement of  
 571 wayfinding uncertainty in indoor environments. Once  
 572 these neural measurements of uncertainty states are  
 573 further refined and confirmed in broader studies, they  
 574 can be used to conduct rigorous and efficient research  
 575 with important applications for building design and pre-

576 occupancy evaluation. The current study contributes to  
 577 the development of a novel continuous measures for as-  
 578 sessing the level of uncertainty during navigation at any  
 579 given moment. As suggested by [14], continuous navi-  
 580 gation data can provide important insights into what in-  
 581 formation someone seeks to reduce that uncertainty and  
 582 can better explain the cognition-action loop contribut-  
 583 ing to spatial learning and decision making. The EEG-  
 584 based classification approach to identifying wayfinding  
 585 uncertainty that we developed here can potentially al-  
 586 lows researchers to test hypotheses about the impact of  
 587 environmental features on human behavior. Applica-  
 588 tions of this approach stretch across numerous architec-  
 589 tural specialties, as well as other “spatial professions”  
 590 such as the design of immersive video games and spher-  
 591 ical cinema [84]. Continuing to improve our under-  
 592 standing of the neurological components of wayfind-  
 593 ing uncertainty could also potentially contribute to new  
 594 types of navigational aid design and more effective ap-  
 595 proaches to familiarizing people to a new spatial envi-  
 596 ronment. In high-stakes situations, such as those involv-  
 597 ing emergency first responders or helping patients to  
 598 reach the appropriate care centers, providing the right  
 599 information as uncertainty arises could improve out-  
 600 comes and help to reduce anxiety.

#### 601 4.1. Limitations and Future Work

602 The binary classification approach followed in this  
 603 study is dependent on the class labels (certainty vs. un-  
 604 certainty) and the labeling procedure that was imple-  
 605 mented. The certainty/uncertainty scores provided by  
 606 human annotators followed a specific procedure (Ap-  
 607 pendix B), which may not be generalizable to other  
 608 wayfinding contexts. The interpretation of the neural  
 609 features associated with the classification performance  
 610 must be understood in the context of this specific rat-  
 611 ing approach, as well as the hospital environment and the  
 612 types of navigational tasks performed (Appendix A).

613 Using VR to investigate wayfinding navigation has  
 614 some limitations, particularly in that physical cues, tex-  
 615 tures, and sounds may differ from real-world environ-  
 616 ments. Some researchers have argued that the brain’s  
 617 predictive capability effectively short-circuits the body  
 618 and its broader related processes in VR if the visual per-  
 619 ception is in line with the body’s actions, for instance,  
 620 when head movements result in predictable alterations  
 621 in visual information [85]. However, additional studies  
 622 using mobile EEG in non-virtual contexts are needed to  
 623 determine if the results from VR can be fully general-  
 624 ized to real-world environments.

625 Experiences of wayfinding uncertainty, along with  
 626 the associated behaviors and neural dynamics, are ex-

627 pected to change gradually and continuously during the 677  
628 wayfinding process. If changes in sensory- information 678  
629 processing, decision making, and action (walking, turn- 679  
630 ing, stopping) occur intermittently in a typical wayfind-  
631 ing task, we can expect that the associated neural dy-  
632 namics would be modulated correspondingly. Our re-  
633 sults using two-class models provide evidence of dis-  
634 tinguishable neural features in pre-labeled certainty and  
635 uncertainty epochs, but not their modulation in transi-  
636 tion states. In future studies we plan to conduct single-  
637 trial dynamic characterizations of behavioral and neu-  
638 ral data, which will help to quantify the neural pattern  
639 modulations associated specific aspects of wayfinding  
640 activities and their transitions.

641 These effects should be studied further in regards to 687  
642 design elements to guide wayfinding cues in the built 688  
643 environment and VR spaces. Cross- participant differ- 689  
644 ences and optimized machine learning models that take 690  
645 into account different wayfinding strategies (e.g. allo- 691  
646 centric vs. egocentric oriented participants) [26] may 692  
647 provide more information about the EEG features that 693  
648 are linked to wayfinding certainty and uncertainty states 694  
649 and help to ensure that architectural designs and cues 695  
650 are useful for the entire human population.

651 Recent study [86] has shown the potential of “aug- 696  
652 mented reality” (virtual information overlaid onto real 697  
653 spaces) as a tool to improve wayfinding performance 698  
654 and decrease cognitive loads during wayfinding tasks. 699  
655 Findings from neurological studies on wayfinding un- 700  
656 certainty and responses to environmental cues may as- 701  
657 sist in the development of such tools, leading to a more  
658 context-aware and user-aware intelligent wayfinding aid  
659 system.

## 660 5. Conclusion

661 This study took a machine-learning classification ap-  
662 proach to gain a better understanding of neurological  
663 features associated with periods of uncertainty during  
664 navigation. This study used a VR hospital environ-  
665 ment, and participants were asked to complete wayfind-  
666 ing tasks of varying difficulty. Two observers indepen-  
667 dently annotated human mental uncertainty state on a  
668 scale from 1 (low) to 5 (high). We implemented random  
669 forest classifiers to predict researcher-identified uncer-  
670 tainty states from the EEG common spatial patterns  
671 across various frequency bands and an AUC score of  
672 0.70. We also observed an increase in alpha power in  
673 fronto-parietal regions with a corresponding suppres-  
674 sion of frontal theta power in high-uncertainty condi-  
675 tions, and the opposite patterns in the low-uncertainty  
676 condition. Our results indicate that the frontal theta and

occipital alpha power of EEG can potentially be used as  
a metric to quantify uncertainty states during wayfind-  
ing.

## 680 Funding

681 The authors disclosed receipt of the following finan-  
682 cial support for the research, authorship, and/or pub-  
683 lication of this article: This research was fully sup-  
684 ported by the National Science Foundation (NSF) Divi-  
685 sion of Information & Intelligent Systems (award num-  
686 ber 2008501).

## 687 Acknowledgement

688 The authors gratefully acknowledge Parkin Archi-  
689 tects, the Government of Newfoundland and Labrador,  
690 the Western Regional Health Authority and the Corner  
691 Brook Acute Care Hospital. The authors thank the team  
692 at the Design and Augmented Intelligence Lab at Cor-  
693 nell University, including Armin Mostafavi, Qi Yang,  
694 Talia Fishman, Viraj Govani, Julia Kan, Jeffrey Neo,  
695 Mi Rae Kim, Matthew Canabarro, Emme Wong, Clair  
696 Choi, Elita Gao, and Michael Darfler for assisting in vi-  
697 sualization of VR environments, data collection, and la-  
698 beling wayfinding uncertainty epoch. The authors also  
699 thank the interior design and wayfinding/signage design  
700 team at Parkin Architects in Joint Venture with B+H Ar-  
701 chitects.

## 702 References

- 703 [1] C.-T. Lin, T.-C. Chiu, K. Gramann, Eeg correlates of spatial ori-  
704 entation in the human retrosplenial complex, *NeuroImage* 120  
705 (2015) 123–132.
- 706 [2] B. L. McNoughton, F. P. Battaglia, O. Jensen, E. I. Moser, M.-  
707 B. Moser, Path integration and the neural basis of the ‘cognitive  
708 map’, *Nature Reviews Neuroscience* 7 (8) (2006) 663–678.
- 709 [3] M. A. Hogg, Subjective uncertainty reduction through self-  
710 categorization: A motivational theory of social identity pro-  
711 cesses, *European review of social psychology* 11 (1) (2000)  
712 223–255.
- 713 [4] G. Weary, J. A. Edwards, Causal-uncertainty beliefs and related  
714 goal structures. (1996).
- 715 [5] N. McNoughton, J. A. Gray, Anxiolytic action on the be-  
716 havioural inhibition system implies multiple types of arousal  
717 contribute to anxiety, *Journal of affective disorders* 61 (3) (2000)  
718 161–176.
- 719 [6] M. Rabin, R. H. Thaler, Anomalies: risk aversion, *Journal of*  
720 *Economic perspectives* 15 (1) (2001) 219–232.
- 721 [7] K. Van den Bos, Making sense of life: The existential self trying  
722 to deal with personal uncertainty, *Psychological Inquiry* 20 (4)  
723 (2009) 197–217.
- 724 [8] J. B. Hirsh, R. A. Mar, J. B. Peterson, Psychological entropy: a  
725 framework for understanding uncertainty-related anxiety., *Psy-  
726 chological review* 119 (2) (2012) 304.

- [9] D. W. Grupe, J. B. Nitschke, Uncertainty and anticipation in anxiety: an integrated neurobiological and psychological perspective, *Nature Reviews Neuroscience* 14 (7) (2013) 488–501.
- [10] R. N. Carleton, Fear of the unknown: One fear to rule them all?, *Journal of anxiety disorders* 41 (2016) 5–21.
- [11] M.-L. Vives, O. FeldmanHall, Tolerance to ambiguous uncertainty predicts prosocial behavior, *Nature communications* 9 (1) (2018) 1–9.
- [12] T. T. Brunyé, Z. A. Collier, J. Cantelon, A. Holmes, M. D. Wood, I. Linkov, H. A. Taylor, Strategies for selecting routes through real-world environments: Relative topography, initial route straightness, and cardinal direction, *PLoS One* 10 (5) (2015) e0124404.
- [13] M. Tomko, K.-F. Richter, Defensive wayfinding: Incongruent information in route following, in: *International Conference on Spatial Information Theory*, Springer, 2015, pp. 426–446.
- [14] A. M. Keller, H. A. Taylor, T. T. Brunyé, Uncertainty promotes information-seeking actions, but what information?, *Cognitive Research: Principles and Implications* 5 (1) (2020) 1–17.
- [15] T. T. Brunyé, Z. D. Haga, L. A. Houck, H. A. Taylor, You look lost: understanding uncertainty and representational flexibility in navigation, in: *Representations in Mind and World*, Routledge, 2017, pp. 42–56.
- [16] R. K. Dubey, T. Thrash, M. Kapadia, C. Hoelscher, V. R. Schinazi, Information theoretic model to simulate agent-signage interaction for wayfinding, *Cognitive Computation* 13 (1) (2021) 189–206.
- [17] T. T. Brunyé, A. L. Gardony, Eye tracking measures of uncertainty during perceptual decision making, *International Journal of Psychophysiology* 120 (2017) 60–68.
- [18] J. F. Cavanagh, T. V. Wiecki, A. Kochar, M. J. Frank, Eye tracking and pupillometry are indicators of dissociable latent decision processes., *Journal of Experimental Psychology: General* 143 (4) (2014) 1476.
- [19] J. F. Thayer, F. Åhs, M. Fredrikson, J. J. Sollers III, T. D. Wager, A meta-analysis of heart rate variability and neuroimaging studies: implications for heart rate variability as a marker of stress and health, *Neuroscience & Biobehavioral Reviews* 36 (2) (2012) 747–756.
- [20] A. E. Urai, A. Braun, T. H. Donner, Pupil-linked arousal is driven by decision uncertainty and alters serial choice bias, *Nature communications* 8 (1) (2017) 1–11.
- [21] H. R. Heekeren, S. Marrett, L. G. Ungerleider, The neural systems that mediate human perceptual decision making, *Nature reviews neuroscience* 9 (6) (2008) 467–479.
- [22] É. Payzan-LeNestour, P. Bossaerts, Do not bet on the unknown versus try to find out more: estimation uncertainty and “unexpected uncertainty” both modulate exploration, *Frontiers in neuroscience* 6 (2012) 150.
- [23] A. Coutinho, F. H. Porto, F. L. Duran, S. Prando, C. R. Ono, E. A. Feitosa, L. Spíndola, M. O. de Oliveira, P. H. do Vale, H. R. Gomes, et al., Brain metabolism and cerebrospinal fluid biomarkers profile of non-amnesic mild cognitive impairment in comparison to amnesic mild cognitive impairment and normal older subjects, *Alzheimer’s research & therapy* 7 (1) (2015) 1–10.
- [24] W. E. Shields, J. D. Smith, D. A. Washburn, Uncertain responses by humans and rhesus monkeys (*macaca mulatta*) in a psychophysical same–different task., *Journal of Experimental Psychology: General* 126 (2) (1997) 147.
- [25] B. J. Stankiewicz, G. E. Legge, J. S. Mansfield, E. J. Schlicht, Lost in virtual space: Studies in human and ideal spatial navigation., *Journal of Experimental Psychology: Human Perception and Performance* 32 (3) (2006) 688.
- [26] K. Gramann, J. Onton, D. Riccobon, H. J. Mueller, S. Bardins, S. Makeig, Human brain dynamics accompanying use of egocentric and allocentric reference frames during navigation, *Journal of cognitive neuroscience* 22 (12) (2010) 2836–2849.
- [27] K. Gramann, H. Müller, B. Schönebeck, G. Debus, The neural basis of ego-and allocentric reference frames in spatial navigation: Evidence from spatio-temporal coupled current density reconstruction, *Brain research* 1118 (1) (2006) 116–129.
- [28] M. Plank, H. J. Müller, J. Onton, S. Makeig, K. Gramann, Human eeg correlates of spatial navigation within egocentric and allocentric reference frames, in: *International Conference on Spatial Cognition*, Springer, 2010, pp. 191–206.
- [29] T.-C. Chiu, K. Gramann, L.-W. Ko, J.-R. Duann, T.-P. Jung, C.-T. Lin, Alpha modulation in parietal and retrosplenial cortex correlates with navigation performance, *Psychophysiology* 49 (1) (2012) 43–55.
- [30] C. M. Bird, N. Burgess, The hippocampus and memory: insights from spatial processing, *Nature Reviews Neuroscience* 9 (3) (2008) 182–194.
- [31] N. Burgess, E. A. Maguire, J. O’Keefe, The human hippocampus and spatial and episodic memory, *Neuron* 35 (4) (2002) 625–641.
- [32] R. A. Epstein, Parahippocampal and retrosplenial contributions to human spatial navigation, *Trends in cognitive sciences* 12 (10) (2008) 388–396.
- [33] E. Maguire, The retrosplenial contribution to human navigation: a review of lesion and neuroimaging findings, *Scandinavian journal of psychology* 42 (3) (2001) 225–238.
- [34] H. J. Spiers, E. A. Maguire, Thoughts, behaviour, and brain dynamics during navigation in the real world, *Neuroimage* 31 (4) (2006) 1826–1840.
- [35] H. Spiers, E. Maguire, The neuroscience of remote spatial memory: a tale of two cities, *Neuroscience* 149 (1) (2007) 7–27.
- [36] S. D. Vann, J. P. Aggleton, E. A. Maguire, What does the retrosplenial cortex do?, *Nature reviews neuroscience* 10 (11) (2009) 792–802.
- [37] T.-T. N. Do, C.-T. Lin, K. Gramann, Human brain dynamics in active spatial navigation, *Scientific Reports* 11 (1) (2021) 1–12.
- [38] G. Committeri, G. Galati, A.-L. Paradis, L. Pizzamiglio, A. Berthoz, D. LeBihan, Reference frames for spatial cognition: different brain areas are involved in viewer-, object-, and landmark-centered judgments about object location, *Journal of cognitive neuroscience* 16 (9) (2004) 1517–1535.
- [39] T. Wolbers, J. M. Wiener, H. A. Mallot, C. Büchel, Differential recruitment of the hippocampus, medial prefrontal cortex, and the human motion complex during path integration in humans, *Journal of Neuroscience* 27 (35) (2007) 9408–9416.
- [40] O. Ghaem, E. Mellet, F. Crivello, N. Tzourio, B. Mazoyer, A. Berthoz, M. Denis, Mental navigation along memorized routes activates the hippocampus, precuneus, and insula, *Neuroreport* 8 (3) (1997) 739–744.
- [41] T. Ino, Y. Inoue, M. Kage, S. Hirose, T. Kimura, H. Fukuyama, Mental navigation in humans is processed in the anterior bank of the parieto-occipital sulcus, *Neuroscience letters* 322 (3) (2002) 182–186.
- [42] E. A. Maguire, N. Burgess, J. G. Donnett, R. S. Frackowiak, C. D. Frith, J. O’Keefe, Knowing where and getting there: a human navigation network, *Science* 280 (5365) (1998) 921–924.
- [43] G. Rauchs, P. Orban, E. Balteau, C. Schmidt, C. Degueldre, A. Luxen, P. Maquet, P. Peigneux, Partially segregated neural networks for spatial and contextual memory in virtual navigation, *Hippocampus* 18 (5) (2008) 503–518.
- [44] Y. Wang, Y. Shi, J. Du, Y. Lin, Q. Wang, A cnn-based personalized system for attention detection in wayfinding tasks, *Advanced Engineering Informatics* 46 (2020) 101180.
- [45] S. Kalantari, A new method of human response testing to en-

- 857       hance the design process, in: Proceedings of the Design Society: International Conference on Engineering Design, Vol. 1, Cambridge University Press, 2019, pp. 1883–1892.
- 858  
859  
860 [46] E. Duarte, F. Rebelo, M. S. Wogalter, Virtual reality and its potential for evaluating warning compliance, *Human Factors and Ergonomics in Manufacturing & Service Industries* 20 (6) (2010) 526–537.
- 861  
862  
863  
864 [47] M. Kinateder, W. H. Warren, K. B. Schloss, What color are emergency exit signs? egress behavior differs from verbal report, *Applied ergonomics* 75 (2019) 155–160.
- 865  
866  
867 [48] D. C. Cliburn, S. L. Rilea, Showing users the way: Signs in virtual worlds, in: 2008 IEEE Virtual Reality Conference, IEEE, 2008, pp. 129–132.
- 868  
869  
870 [49] T. Heino, D. Cliburn, S. Rilea, J. Cooper, V. Tachkov, Limitations of signs as navigation aids in virtual worlds, in: 2010 43rd Hawaii International Conference on System Sciences, IEEE, 2010, pp. 1–10.
- 871  
872  
873  
874 [50] J. D. Rounds, J. G. Cruz-Garza, S. Kalantari, Using posterior eeg theta band to assess the effects of architectural designs on landmark recognition in an urban setting, *Frontiers in human neuroscience* 14 (2020) 537.
- 875  
876  
877  
878 [51] G. Sharma, Y. Kaushal, S. Chandra, V. Singh, A. P. Mittal, V. Dutt, Influence of landmarks on wayfinding and brain connectivity in immersive virtual reality environment, *Frontiers in psychology* 8 (2017) 1220.
- 879  
880  
881  
882 [52] S. Kalantari, V. Tripathi, J. D. Rounds, A. Mostafavi, R. Snell, J. Cruz-Garza, Evaluating wayfinding designs in healthcare settings through eeg data and virtual response testing, *bioRxiv* (2021).
- 883  
884  
885  
886 [53] S. Kalantari, J. D. Rounds, J. Kan, V. Tripathi, J. G. Cruz-Garza, Comparing physiological responses during cognitive tests in virtual environments vs. in identical real-world environments, *Scientific Reports* 11 (1) (2021) 1–14.
- 887  
888  
889  
890 [54] E. Vilar, F. Rebelo, P. Noriega, Indoor human wayfinding performance using vertical and horizontal signage in virtual reality, *Human Factors and Ergonomics in Manufacturing & Service Industries* 24 (6) (2014) 601–615.
- 891  
892  
893  
894 [55] S. Kalantari, J. R. J. Neo, Virtual environments for design research: lessons learned from use of fully immersive virtual reality in interior design research, *Journal of Interior Design* 45 (3) (2020) 27–42.
- 895  
896  
897  
898 [56] S. Kalantari, J. L. Contreras-Vidal, J. S. Smith, J. Cruz-Garza, P. Banner, Evaluating educational settings through biometric data and virtual response testing (2018).
- 899  
900  
901  
902 [57] Y. Feng, D. C. Duives, S. P. Hoogendoorn, Wayfinding behaviour in a multi-level building: A comparative study of hmd vr and desktop vr, *Advanced Engineering Informatics* 51 (2022) 101475.
- 903  
904  
905  
906 [58] A. S. Devlin, Wayfinding in healthcare facilities: Contributions from environmental psychology, *Behavioral sciences* 4 (4) (2014) 423–436.
- 907  
908  
909 [59] P. Mollerup, Wayshowing in hospital, *Australasian Medical Journal (Online)* 10 (2009) 112.
- 910  
911  
912 [60] J. Peponis, C. Zimring, Y. K. Choi, Finding the building in wayfinding, *Environment and behavior* 22 (5) (1990) 555–590.
- 913  
914  
915 [61] C. Zimring, The cost of confusion: Non-monetary and monetary cost of the emory university hospital wayfinding system, Atlanta: Georgia Institute of Technology 91 (2) (1990).
- 916  
917  
918 [62] S. Kalantari, R. Snell, Post-occupancy evaluation of a mental healthcare facility based on staff perceptions of design innovations, *HERD: Health Environments Research & Design Journal* 10 (4) (2017) 121–135.
- 919  
920 [63] C. Kothe, Lab streaming layer (lsl) (2014).
- 921  
922 [64] A. Delorme, S. Makeig, Eeglab: an open source toolbox for analysis of single-trial eeg dynamics including independent component analysis, *Journal of neuroscience methods* 134 (1) (2004) 9–21.
- 923  
924 [65] N. Bigdely-Shamlo, T. Mullen, C. Kothe, K.-M. Su, K. A. Robbins, The prep pipeline: standardized preprocessing for large-scale eeg analysis, *Frontiers in neuroinformatics* 9 (2015) 16.
- 925  
926  
927 [66] A. S. Ravindran, A. Mobiny, J. G. Cruz-Garza, A. Paek, A. Kopteva, J. L. C. Vidal, Assaying neural activity of children during video game play in public spaces: a deep learning approach, *Journal of neural engineering* 16 (3) (2019) 036028.
- 928  
929  
930  
931 [67] J. G. Cruz-Garza, A. Sujatha Ravindran, A. E. Kopteva, C. Rivera Garza, J. L. Contreras-Vidal, Characterization of the stages of creative writing with mobile eeg using generalized partial directed coherence, *Frontiers in human neuroscience* 14 (2020) 533.
- 932  
933  
934  
935 [68] T. Mullen, C. Kothe, Y. M. Chi, A. Ojeda, T. Kerth, S. Makeig, G. Cauwenberghs, T.-P. Jung, Real-time modeling and 3d visualization of source dynamics and connectivity using wearable eeg, in: 2013 35th annual international conference of the IEEE engineering in medicine and biology society (EMBC), IEEE, 2013, pp. 2184–2187.
- 936  
937  
938  
939 [69] L. Pion-Tonachini, K. Kreutz-Delgado, S. Makeig, Iclabel: An automated electroencephalographic independent component classifier, dataset, and website, *NeuroImage* 198 (2019) 181–197.
- 940  
941  
942  
943 [70] J. Müller-Gerking, G. Pfurtscheller, H. Flyvbjerg, Designing optimal spatial filters for single-trial eeg classification in a movement task, *Clinical neurophysiology* 110 (5) (1999) 787–798.
- 944  
945  
946 [71] A. Gramfort, M. Luessi, E. Larson, D. A. Engemann, D. Strohmeier, C. Brodbeck, L. Parkkonen, M. S. Hämäläinen, Mne software for processing meg and eeg data, *Neuroimage* 86 (2014) 446–460.
- 947  
948  
949  
950 [72] M. Shoaran, B. A. Haghi, M. Taghavi, M. Farivar, A. Emami-Neyestanak, Energy-efficient classification for resource-constrained biomedical applications, *IEEE Journal on Emerging and Selected Topics in Circuits and Systems* 8 (4) (2018) 693–707.
- 951  
952  
953  
954 [73] A. Kamrud, B. Borghetti, C. Schubert Kabban, The effects of individual differences, non-stationarity, and the importance of data partitioning decisions for training and testing of eeg cross-participant models, *Sensors* 21 (9) (2021) 3225.
- 955  
956  
957  
958 [74] R. Li, J. S. Johansen, H. Ahmed, T. V. Ilyevsky, R. B. Wilbur, H. M. Bharadwaj, J. M. Siskind, The perils and pitfalls of block design for eeg classification experiments, *IEEE Transactions on Pattern Analysis and Machine Intelligence* 43 (1) (2020) 316–333.
- 959  
960  
961  
962 [75] S. M. Lundberg, B. Nair, M. S. Vavilala, M. Horibe, M. J. Eisses, T. Adams, D. E. Liston, D. K.-W. Low, S.-F. Newman, J. Kim, et al., Explainable machine-learning predictions for the prevention of hypoxaemia during surgery, *Nature biomedical engineering* 2 (10) (2018) 749–760.
- 963  
964  
965  
966 [76] J. B. Caplan, J. R. Madsen, S. Raghavachari, M. J. Kahana, Distinct patterns of brain oscillations underlie two basic parameters of human maze learning, *Journal of neurophysiology* 86 (1) (2001) 368–380.
- 967  
968  
969  
970 [77] M. J. Kahana, R. Sekuler, J. B. Caplan, M. Kirschen, J. R. Madsen, Human theta oscillations exhibit task dependence during virtual maze navigation, *Nature* 399 (6738) (1999) 781–784.
- 971  
972  
973  
974 [78] J. B. Caplan, J. R. Madsen, A. Schulze-Bonhage, R. Aschenbrenner-Scheibe, E. L. Newman, M. J. Kahana, Human  $\theta$  oscillations related to sensorimotor integration and spatial learning, *Journal of Neuroscience* 23 (11) (2003) 4726–4736.
- 975  
976  
977  
978 [79] K. Gramann, D. P. Ferris, J. Gwin, S. Makeig, Imaging natural cognition in action, *International Journal of Psychophysiology* 91 (1) (2014) 22–29.
- 979  
980  
981  
982  
983  
984  
985  
986

- 987 [80] D. J. White, M. Congedo, J. Ciorciari, R. B. Silberstein, Brain 1012  
988 oscillatory activity during spatial navigation: theta and gamma 1013  
989 activity link medial temporal and parietal regions, *Journal of* 1014  
990 *cognitive neuroscience* 24 (3) (2012) 686–697. 1015
- 991 [81] B. V. Ehinger, P. Fischer, A. L. Gert, L. Kaufhold, F. Weber, 1016  
992 G. Pipa, P. König, Kinesthetic and vestibular information modu- 1017  
993 late alpha activity during spatial navigation: a mobile eeg study, 1018  
994 *Frontiers in human neuroscience* 8 (2014) 71. 1019
- 995 [82] B. Blankertz, R. Tomioka, S. Lemm, M. Kawanabe, K.-R. 1020  
996 Muller, Optimizing spatial filters for robust eeg single-trial anal- 1021  
997 ysis, *IEEE Signal processing magazine* 25 (1) (2007) 41–56. 1022
- 998 [83] D. B. De Araújo, O. Baffa, R. T. Wakai, Theta oscillations and 1023  
999 human navigation: a magnetoencephalography study, *Journal of* 1024  
1000 *Cognitive Neuroscience* 14 (1) (2002) 70–78. 1025
- 1001 [84] S. Gepshtein, J. Snider, Neuroscience for architecture: The 1026  
1002 evolving science of perceptual meaning, *Proceedings of the Na-* 1027  
1003 *tional Academy of Sciences* 116 (29) (2019) 14404–14406. 1028
- 1004 [85] G. Riva, B. K. Wiederhold, F. Mantovani, Neuroscience of vir- 1029  
1005 tual reality: from virtual exposure to embodied medicine, *Cy-* 1030  
1006 *berpsychology, Behavior, and Social Networking* 22 (1) (2019) 1031  
1007 82–96. 1032
- 1008 [86] J. Zhang, X. Xia, R. Liu, N. Li, Enhancing human indoor cog- 1033  
1009 nitive map development and wayfinding performance with im- 1034  
1010 mersive augmented reality-based navigation systems, *Advanced* 1035  
1011 *Engineering Informatics* 50 (2021) 101432. 1036

## Appendix A. Description of Wayfinding Task

Description of the wayfinding tasks are included in the Table 2, and examples of the virtual stimuli included in the Figure A.7.

## Appendix B. Coding Wayfinding Uncertainty

We screened the recorded first-person perspective videos for all participants. Each recorded video was divided into 5-second clips, leading to a total of 1270 video segments. Wayfinding uncertainty scores were assigned to each 5-second clip using the following procedure.

First, 254 video clips were randomly selected, and two research assistants were asked to rate the navigational uncertainty of the participant during each 5-second clip, on a scale from 1 (low uncertainty) to 5 (high uncertainty), based on their own individual interpretations of the videos. The Cohen’s kappa inter-rater reliability score for these ratings was 0.48.

After this initial pilot rating, a group meeting was held to review points of consistency and divergence in the research assistants’ ratings. In this discussion we identified behavioral indicators to help the raters reduce their points of disagreement. Those behavioral indicators were: (1) decisive movement, (2) exploratory movement, (3) turning around, (4) swinging head, (5) made decision, (7) intention to move, and (8) other actions. The raters were asked to determine which of these indicators was present in each video segment.

In “decisive movement,” the participant moved without hesitation and in a firm rhythm. In contrast, “exploratory movement” referred to segments in which the participant was moving but paused frequently to evaluate signs or environmental cues to guide their navigation. Participants were “turning around” during a segment if they rotated in only one direction, from left to right for example. They were regarded as “swinging head” if they turned their heads in both directions, which implied they were hesitating. If they moved after “turning around” or “swinging head,” they were regarded as having “made [a] decision.” If they began to enter motion instructions in the controller during the video segment, then they showed “intention to move.” If the participants’ behavior during the clip was not relevant to wayfinding activities—for example if they were standing in an elevator or encountering technical issues—then the video clip would be identified as “other actions.”

The manner in which the raters were instructed to evaluate the videos is shown in Figure 9. An uncertainty

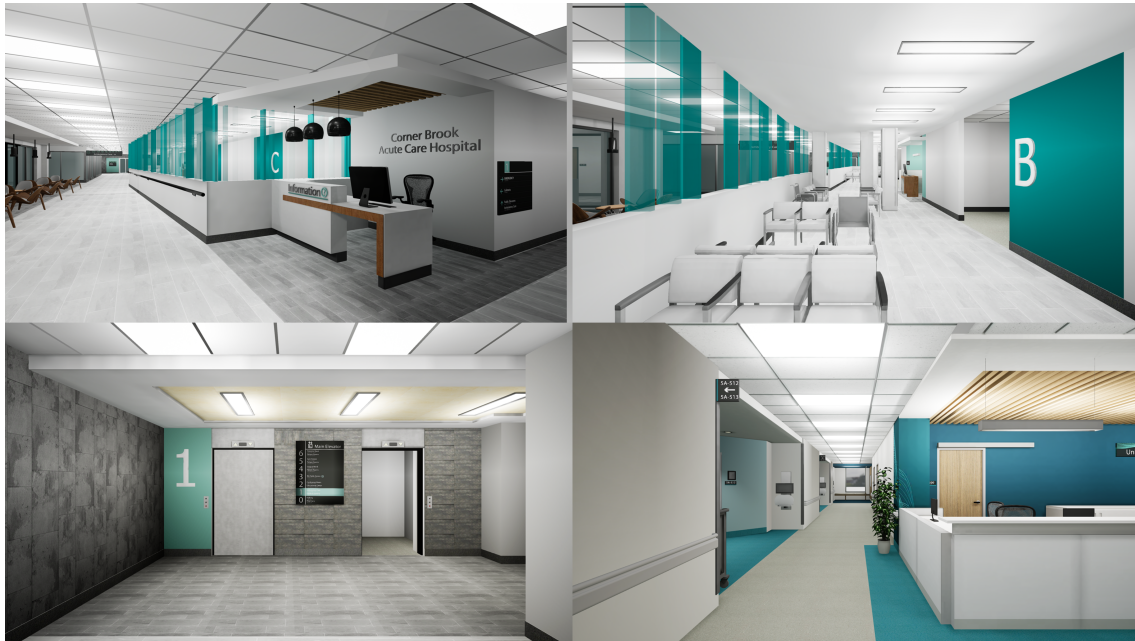

Figure A.7: Examples (screenshots) of the VR hospital environment.

1061 score of 0 was given if the clip showed only “other ac-  
 1062 tions”; these clips were excluded from the data analy-  
 1063 sis. An uncertainty score of 1 was given to videos when  
 1064 participants were moving decisively most of the time.  
 1065 A score of 2 was given if the participant was conduct-  
 1066 ing exploratory movement. If the participant made a  
 1067 decision after turning around the video would be given  
 1068 a score of 3. If the participant turned around without  
 1069 making a decision, or if they swung their head and then  
 1070 initiated a movement, the video would be given a score  
 1071 of 4. Finally, if the participant swung their head but  
 1072 showed no intention to move, the clip was given an un-  
 1073 certainty rating of 5.

1074 Finally, all 1270 video clips were reviewed by the two  
 1075 annotators. The 5-level uncertainty measurement refers  
 1076 to the raw ratings from annotators. We further calcul-  
 1077 ated the 2-level uncertainty scores by simple threshold-  
 1078 ing (Table B.1), which is used for binary classification.  
 1079 The results of these final ratings produced a 0.53 kappa  
 1080 score for 5-level uncertainty, and 0.88 kappa score for  
 1081 2-level uncertainty (Table 1).

Table B.1: Cohen’s Kappa for the behavioral uncertainty ratings.

|                  | 5-level<br>uncertainty | 2-level<br>uncertainty* | Other<br>actions |
|------------------|------------------------|-------------------------|------------------|
| Cohen’s<br>Kappa | 0.53                   | 0.88                    | 0.75             |

\* uncertainty score = 1, uncertainty score  $\geq 4$ .

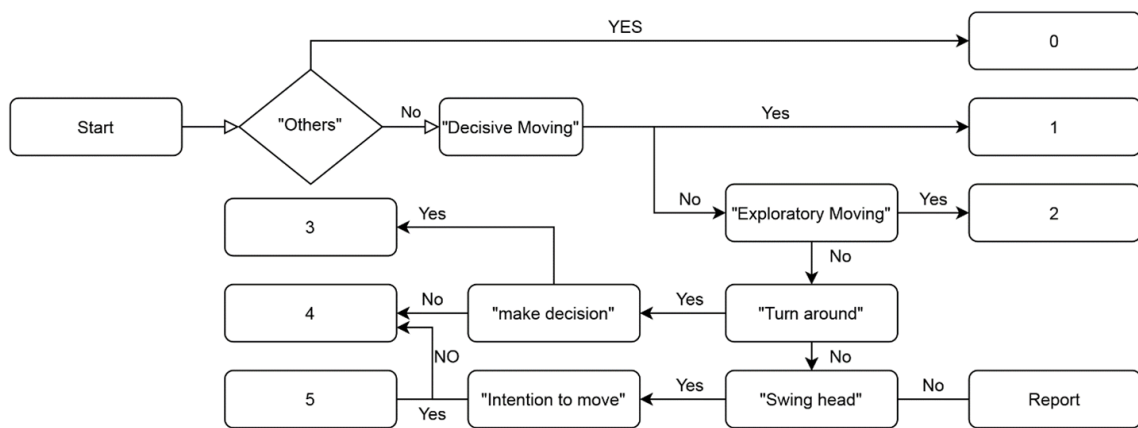

Figure B.8: Decision pipeline of uncertainty ratings.

Table B.2: Wayfinding tasks.

| Task    | Origin                         | Destination                                | Description                                                                                                                                                                                                                                                                                                                                                                                  |
|---------|--------------------------------|--------------------------------------------|----------------------------------------------------------------------------------------------------------------------------------------------------------------------------------------------------------------------------------------------------------------------------------------------------------------------------------------------------------------------------------------------|
| Task 1  | Info desk                      | Elevator                                   | The shortest path included walking through the main entrance hallway with furniture on the left side, then seeing the sign for “Ambulatory Care” with directions to turn right at the first intersection, and then seeing a T-shape intersection with the sign “Medical Imaging” in front. After turning right participants could see the sign of “Main Elevator” at the end of the hallway. |
| Task 2  | Elevator                       | Nurse station (Unit A)                     | The shortest path included pressing a button to go up, leaving the elevator and seeing a white wall with the icon “Floor 5;” seeing T-shape intersections on both the right and left, seeing a sign with information about Unit A, and going through the corresponding corridor to reach the destination at a center of an H-shape intersection with a sign “Unit A – Care Station.”         |
| Task 3  | Nurse station (Unit A)         | Patient room #5A-511                       | The shortest path included reading the sign listing patient room numbers, taking the appropriate corridor, and finding the appropriate room in the corridor.                                                                                                                                                                                                                                 |
| Task 4  | Patient room #5A-511           | Elevator                                   | Same environment as described in Tasks 2 and 3.                                                                                                                                                                                                                                                                                                                                              |
| Task 5  | Elevator                       | Hospital main entrance                     | Same environment as described in Tasks 2.                                                                                                                                                                                                                                                                                                                                                    |
| Task 6  | Hospital main entrance         | Ambulatory care reception desk             | Same environment as described in Tasks 1 and 2. After seeing the sign “Ambulatory Care” individuals will turn right and see another hallway with the sign “Ambulatory Care Reception Desk” in front of them.                                                                                                                                                                                 |
| Task 7  | Ambulatory care reception desk | Treatment chair #4 (Section C)             | The shortest path included seeing three corridors with the large icons “A,” “B,” and “C” on the walls, then going through the appropriate hallway past room number signs on both sides, passing an intersection with information about Clinic C, then reaching the appropriate chair.                                                                                                        |
| Task 8  | Treatment chair #4 (Section C) | Back to the ambulatory care reception desk | Same environment as described in Task 7.                                                                                                                                                                                                                                                                                                                                                     |
| Task 9  | Ambulatory care reception desk | Cafeteria cashier                          | The shortest path included seeing the sign in the front corridor describing the direction to Medical Imaging, Cafeteria, and Ambulatory Care, then turning left, reaching a T-intersection, and seeing the cafeteria located to the right.                                                                                                                                                   |
| Task 10 | Cafeteria cashier              | Hospital main entrance                     | The shortest path back to the hospital entrance included reaching the main hallway then following a short corridor to the information desk, then turning to the right.                                                                                                                                                                                                                       |
